# Supplementary material for: Alendronate/cRGD-Decorated Ultrafine Hyaluronate Dot Targeting Bone Metastasis
Source: PubMed Central journal article supplement (PMC7696888; doi:10.3390/biomedicines8110492), 2020-11-11
Supplement: biomedicines-08-00492-s001.pdf [file biomedicines-08-00492-s001.pdf]

## Supplementary Materials

# Alendronate/cRGD-decorated ultrafine hyaluronate dot targeting bone metastasis

Eunsol Lee <sup>1,†</sup>, Jaeduk Park <sup>1,†</sup>, Yu Seok Youn <sup>2</sup>, Kyung Taek Oh <sup>3</sup>, Dongin Kim <sup>4</sup> and Eun Seong Lee <sup>1,5,\*</sup>

<sup>1</sup> Department of Biotechnology, The Catholic University of Korea, 43 Jibong-ro, Bucheon-si, Gyeonggi-do 14662, Republic of Korea; eunsolleee13@gmail.com (E.L.); jduck0309@naver.com (J.P.); eslee@catholic.ac.kr (E.S.L.)

<sup>2</sup> School of Pharmacy, SungKyunkwan University, 2066 Seobu-ro, Jangan-gu, Suwon, Gyeonggi-do 16419, Republic of Korea; ysyoun@skku.edu (Y.S.Y.)

<sup>3</sup> College of Pharmacy, Chung-Ang University, 221 Heukseok dong, Dongjak-gu, Seoul 06974, Republic of Korea; kyungoh@cau.ac.kr (K.T.O.)

<sup>4</sup> Department of Pharmaceutical Sciences, College of Pharmacy, University of Oklahoma Health Sciences Center, 1110 N Stonewall Ave, Oklahoma City, OK 73117, USA; Dongin-Kim@ouhsc.edu (D.K)

<sup>5</sup> Department of Biomedical Chemical Engineering, The Catholic University of Korea, 43 Jibong-ro, Bucheon-si, Gyeonggi-do 14662, Republic of Korea

\* Correspondence: eslee@catholic.ac.kr; Tel.: +82-02-2164-4921

† These authors equally contributed to this work.

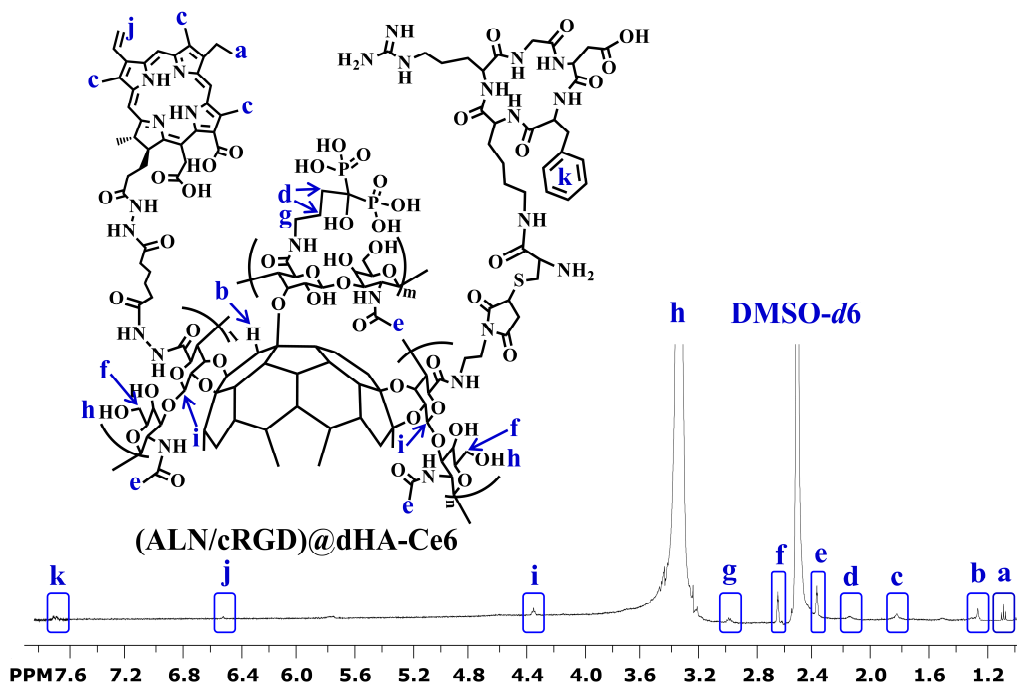

Figure S1. <sup>1</sup>H-NMR peaks of (ALN/cRGD)@dHA-Ce6.

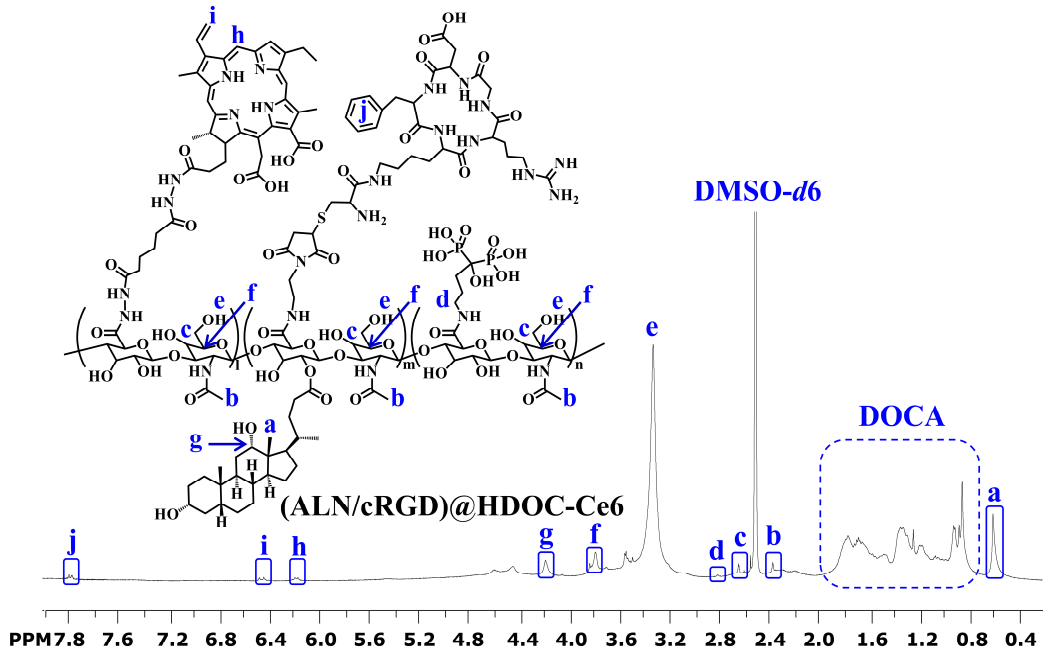

26  
27  
28

Figure S2. <sup>1</sup>H-NMR peaks of (ALN/cRGD)@HDOC-Ce6.

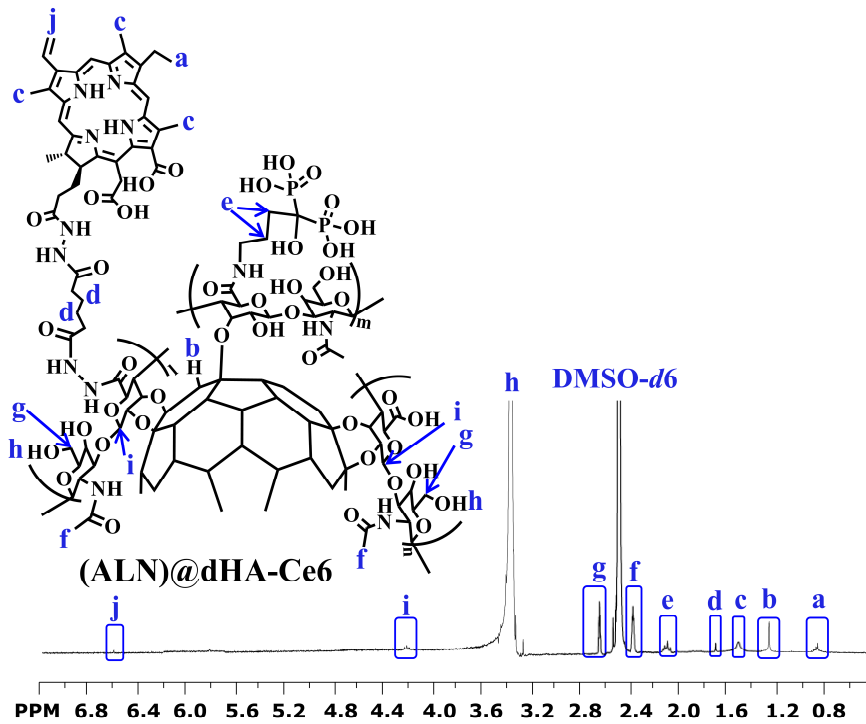

29  
30

Figure S3. <sup>1</sup>H-NMR peaks of (ALN)@dHA-Ce6.

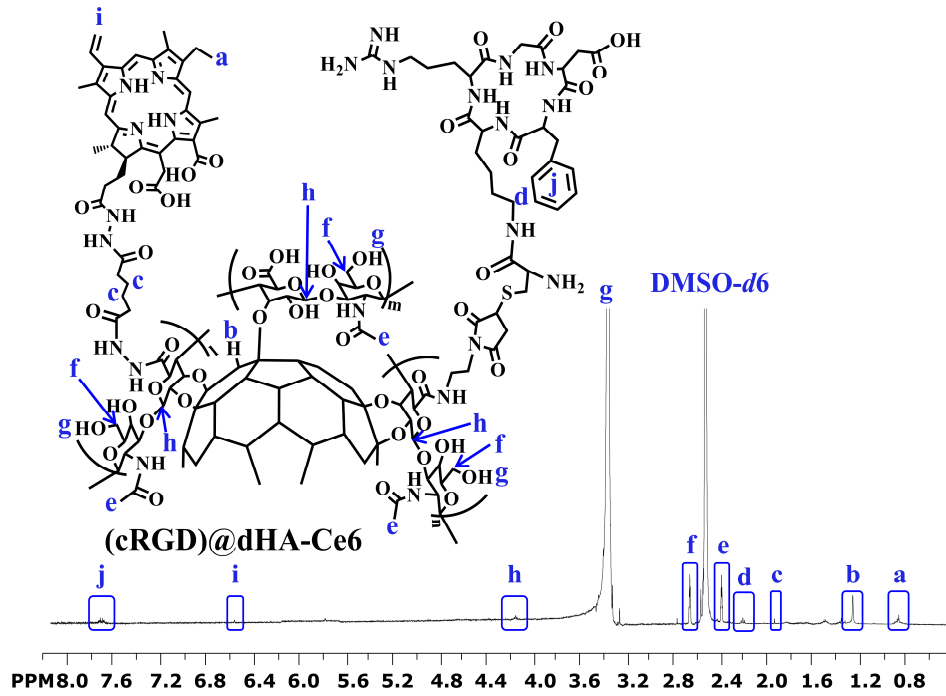

31

32

Figure S4. <sup>1</sup>H-NMR peaks of (cRGD)@dHA-Ce6.

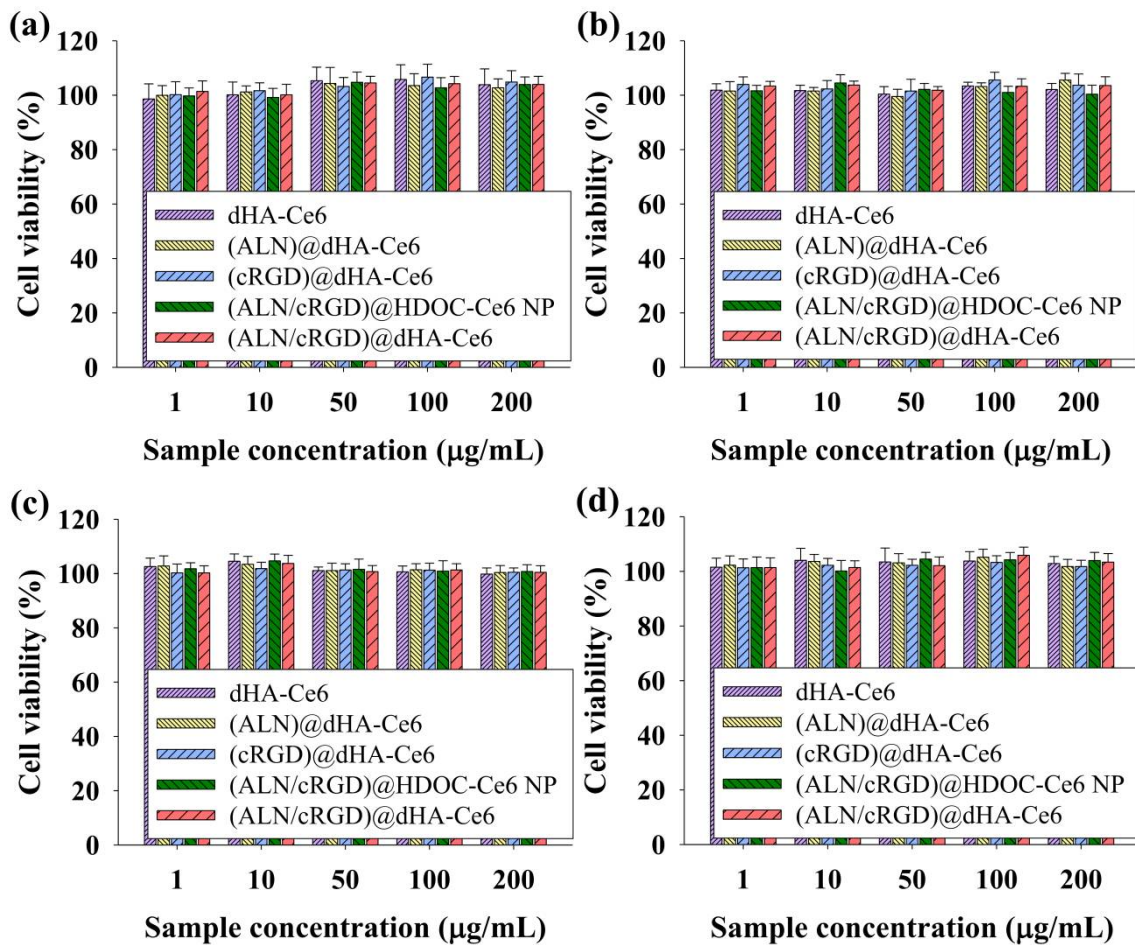

33

34

35

36

37

38

Figure 5. *In vitro* cell viability was determined by a CCK-8 assay of (a) MDA-MB-231, (b) A549, (c) BT-474, and (d) NIH3T3 cells treated with dHA-Ce6, (ALN)@dHA-Ce6, (cRGD)@dHA-Ce6, (ALN/cRGD)@HDQC-Ce6 NP and (ALN/cRGD)@dHA-Ce6 (n = 7, as multiple experiments).

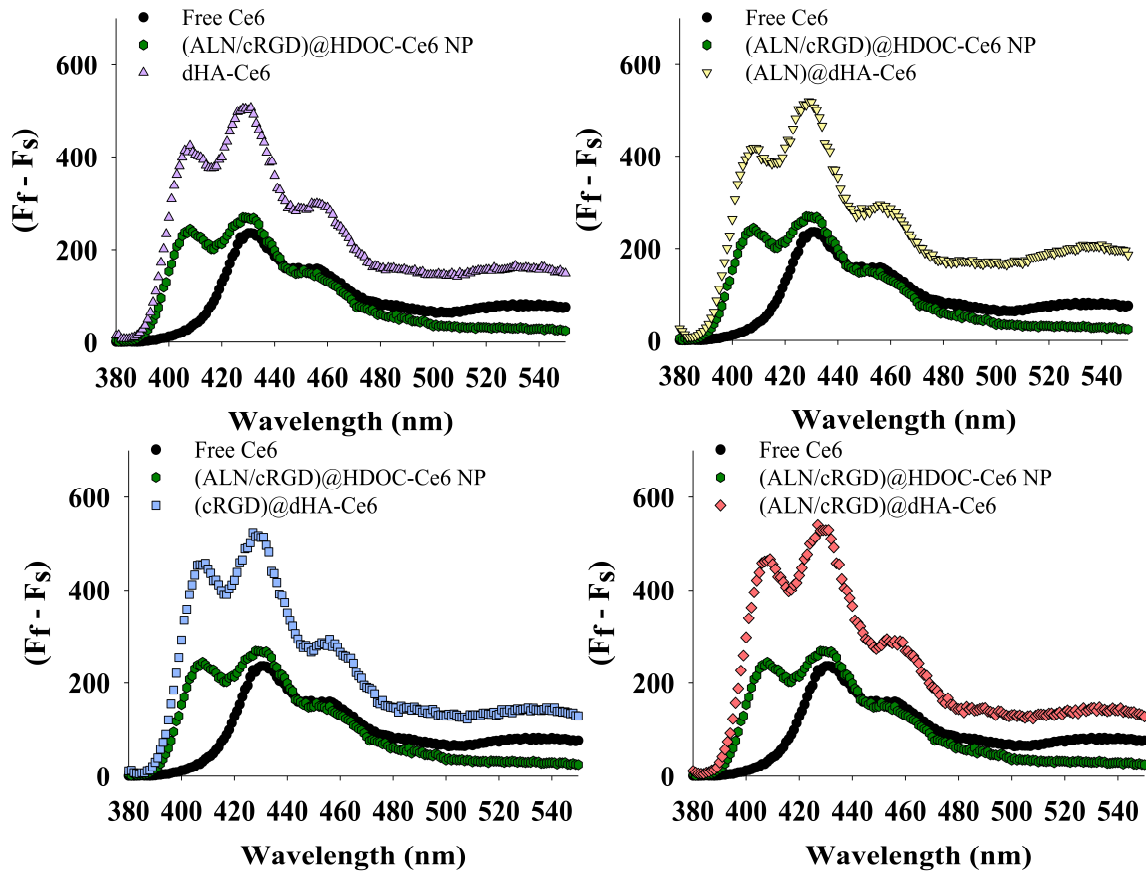

39

40

41

42

43

44

45

46

47

**Figure 6.** The emission spectra (at  $\lambda_{ex}$  of 400 nm and  $\lambda_{em}$  of 600-750 nm) of free Ce6 (10  $\mu\text{g}/\text{mL}$ ) and each sample (equivalent Ce6 10  $\mu\text{g}/\text{mL}$ ) in PBS (pH 7.4, 150 mM). Which is reconstructed by separating the results of Figure 2e. The 9,10-dimethylanthracene (DMAT) fluorescence change (at  $\lambda_{ex}$  of 360 nm and  $\lambda_{em}$  of 380-550 nm) of free Ce6 (10  $\mu\text{g}/\text{mL}$ ) and each sample (equivalent Ce6 10  $\mu\text{g}/\text{mL}$ ) in PBS (pH 7.4, 150 mM). The singlet oxygen generation is indicated by the DMAT fluorescence intensity change ( $F_f - F_s$ , where  $F_f$  is the fluorescence intensity of DMAT and  $F_s$  is the fluorescence intensity of DMAT mixed with the sample).
